# Supplementary material for: Modulation of hypoxia and redox in the solid tumor microenvironment with a catalytic nanoplatform to enhance combinational chemodynamic/sonodynamic therapy
Source: Royal Society of Chemistry journal article supplement (doi:10.1039/d2bm01251k), 2022-12-28
Supplement: d2bm01251k1.pdf [file d2bm01251k1.pdf]

## Supporting Information

# Modulation of Hypoxia and Redox in Solid Tumor Microenvironment with a Catalytic Nanoplatfom to Enhance Combinational Chemodynamic/Sonodynamic Therapy

Yeping Liu, Likai Wang, Fengyuan Wei, Ya Tian, Juan Mou\*, Shiping Yang, Huixia Wu\*

The Education Ministry Key Lab of Resource Chemistry, Joint International Research Laboratory of Resource Chemistry, Ministry of Education, Shanghai Key Laboratory of Rare Earth Functional Materials, Shanghai Municipal Education Committee Key Laboratory of Molecular Imaging Probes and Sensors, and Shanghai Frontiers Science Center of Biomimetic Catalysis, College of Chemistry and Materials Science, Shanghai Normal University, Shanghai 200234, China

E-mail: moujuan@shnu.edu.cn, wuhuixia@shnu.edu.cn

### Materials

Melamine, protoporphyrin IX (PpIX), 1,3-diphenylisobenzofuran (DPBF), 9,10-anthracenediyl-bis(methylene) dimalonate (ABDA), 3,3',5,5'-tetramethylbenzidine (TMB), amiloride hydrochloride ( $C_6H_8ClN_7O \cdot HCl$ ), chlorpromazine hydrochloride ( $C_{17}H_{20}Cl_2N_2S$ ), and genistein ( $C_{15}H_{10}O_5$ ) were purchased from Shanghai Macklin Biochemical Technology Co., Ltd. Potassium permanganate ( $KMnO_4$ ) was provided by Shanghai Titan Technology Co., Ltd. Manganese (II) acetate tetrahydrate ( $Mn(CH_3COO)_2 \cdot 4H_2O$ ) was acquired from Sinopharm Chemical Reagent Co., Ltd. Triethylamine (TEA,  $C_6H_{15}N$ ) was supplied by Shanghai Richjoint Chemical Co., Ltd.

Bovine albumin (BSA) was purchased from Amresco (Solon, OH, USA). Glutathione (GSH) was obtained from Acros. 5,5'-Dithiobis(2-nitrobenzoic acid) was bought from Adamas. 3-(4,5-Dimethylthiazol-2-yl)-2,5-diphenyltetrazolium bromide (MTT) was provided by Meryer Chemical Technology Co., Ltd. 2',7'-Dichlorodihydrofluorescein diacetate (DCFH-DA) was obtained from Beyotime Biotechnology Co., Ltd. Calcein-AM/PI double stain kit was purchased from Yeasen Biotechnology Co., Ltd. All reagents were used as received without further purification. Deionized water with a resistivity higher than 18 M $\Omega$  cm was used in all relevant experiments.

### **Characterizations**

Transmission electron microscopy (TEM) images were acquired on a JEOL JEM-2199 high-resolution transmission electron microscope. Elemental mappings were measured using an FEI Talos F200S/F200X transmission electron microscope. Atomic force microscopy (AFM) measurement was performed with a NT-MDT NTEGRA spectra system. The zeta potentials were measured with a Malvern Zetasizer ZEN3690 analyzer. Ultraviolet-visible (UV-vis) absorption spectra were recorded on a BeckMan coulter DU 730 spectrophotometer. Fourier transform infrared (FT-IR) spectra were collected on a Nicolet Avatar 370 spectrophotometer. The fluorescence spectra were achieved on a Cary Eclipse fluorescence spectrophotometer. X-ray diffraction (XRD) analysis was carried out using a Rigaku DMAX 2000 diffractometer with Cu-K $\alpha$  radiation ( $\lambda = 0.15405$  nm). X-ray photoelectron spectroscopy (XPS) was conducted using an AXIS-165 X-ray spectrometer (Kratos).

### **Supplementary figures**

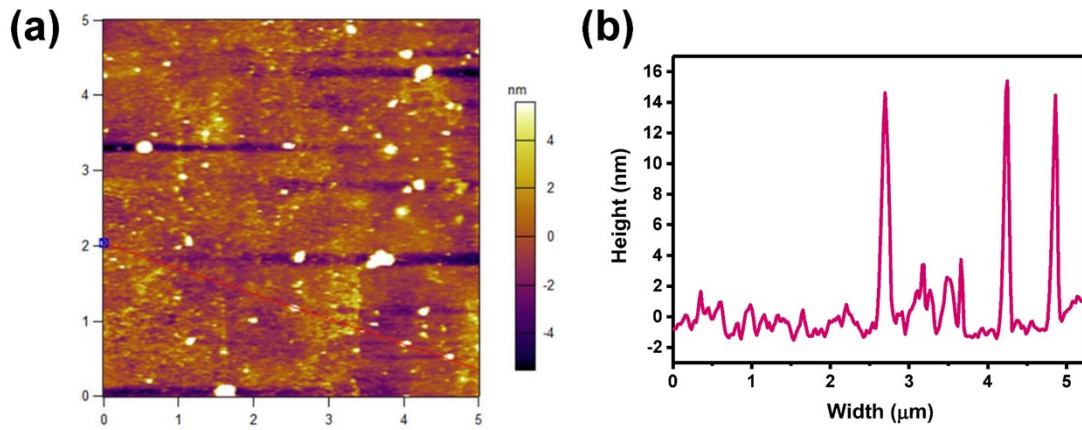

**Fig. S1** AFM image (a) and the height profile (b) of OCN nanosheets.

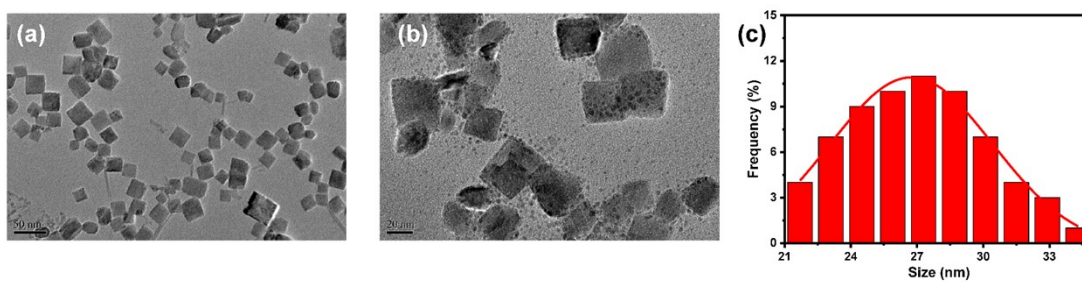

**Fig. S2** TEM images (a-b) and size distribution of pure  $\text{Mn}_3\text{O}_4$  derived without the addition of OCN.

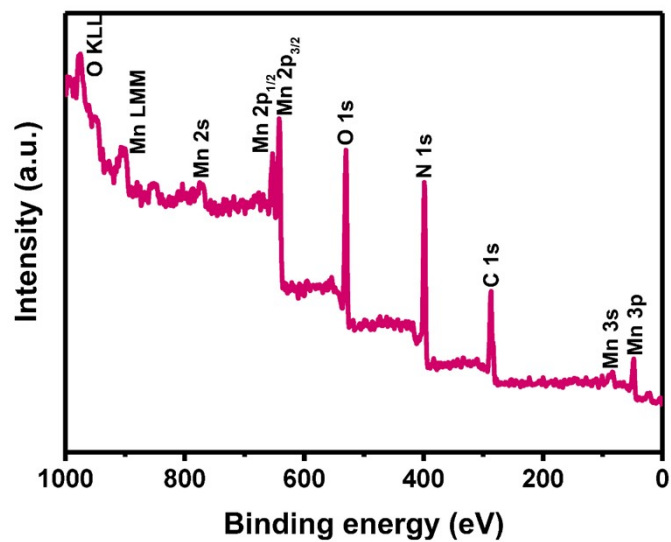

**Fig. S3** The XPS survey spectrum of  $\text{Mn}_3\text{O}_4/\text{OCN}$ .

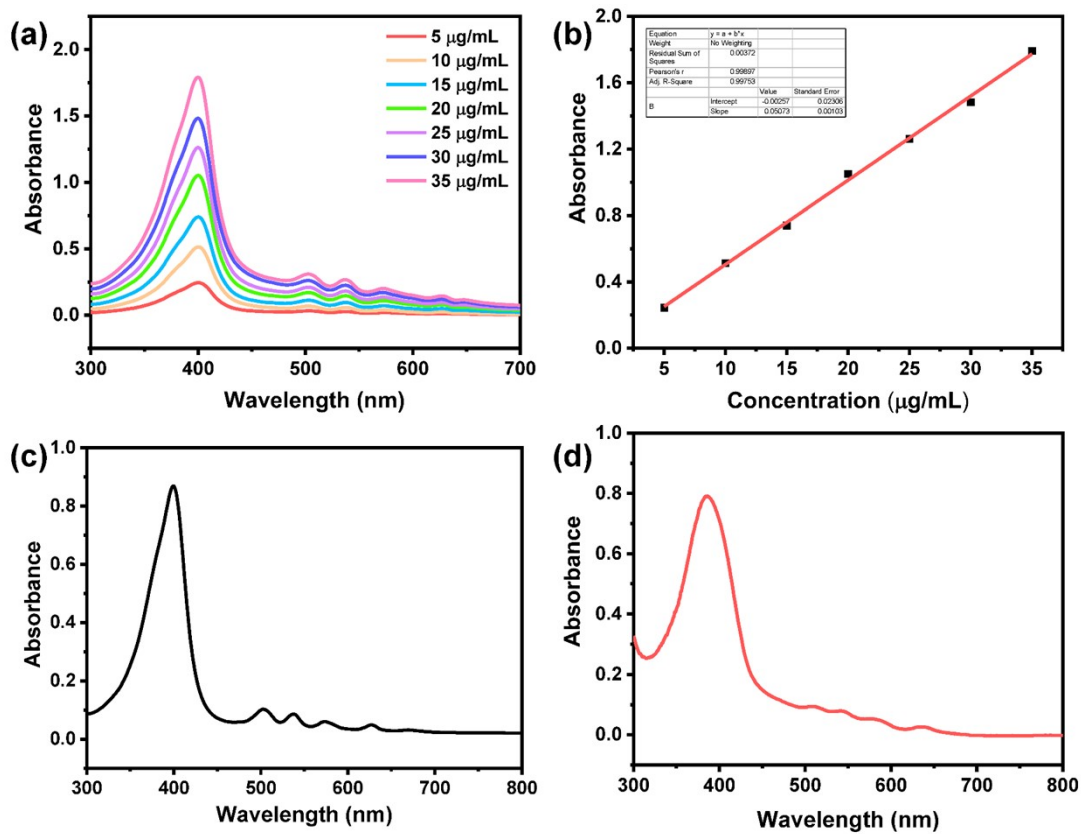

**Fig. S4** (a) UV-Vis absorption spectra of PpIX aqueous solution at different concentrations and corresponding standard curve of PpIX aqueous solution. UV-Vis absorption spectra of the supernatant of Mn<sub>3</sub>O<sub>4</sub>-PpIX (c) and Mn<sub>3</sub>O<sub>4</sub>/OCN-PpIX (d).

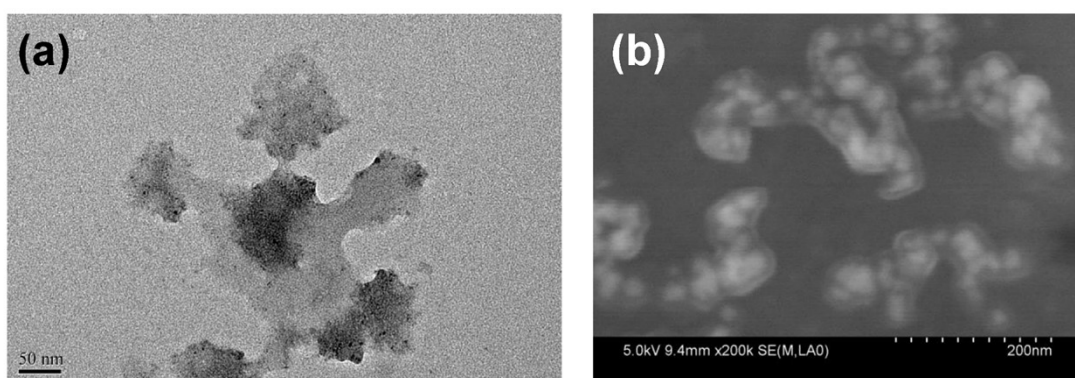

**Fig. S5** TEM (a) and SEM (b) images of Mn<sub>3</sub>O<sub>4</sub>/OCN-PpIX@BSA.

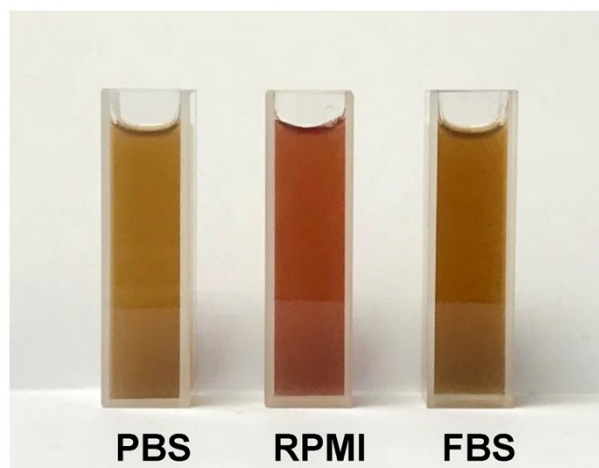

**Fig. S6** The photographs of  $\text{Mn}_3\text{O}_4/\text{OCN-PpIX@BSA}$  dispersed in PBS, RPMI-1640, and FBS solution, respectively.

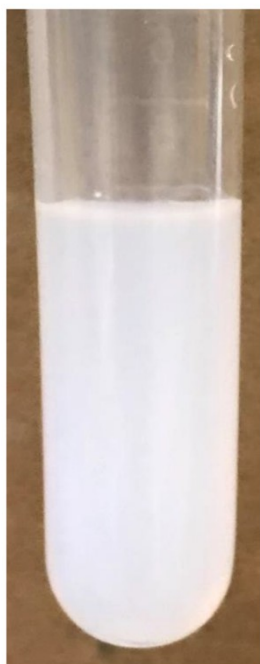

**Fig. S7** Photograph of the mixture of OCN (400  $\mu\text{g}/\text{mL}$ ) and  $\text{H}_2\text{O}_2$  (10 mM), showing no apparent bubble generation.

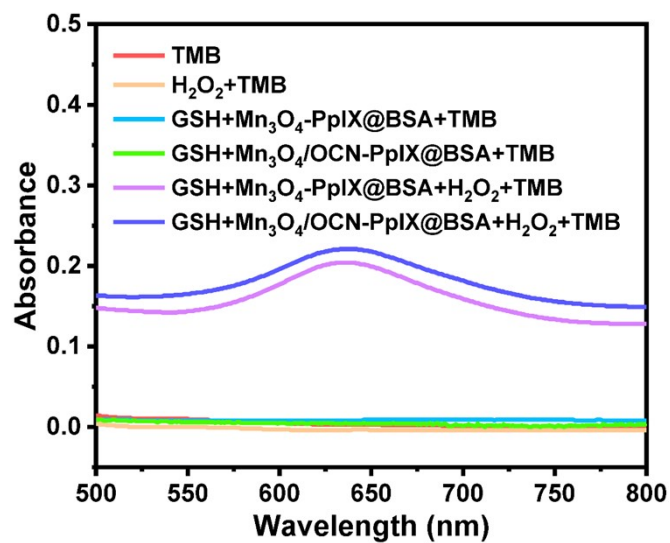

**Fig. S8** Absorption spectra of oxidized TMB in various solution systems.

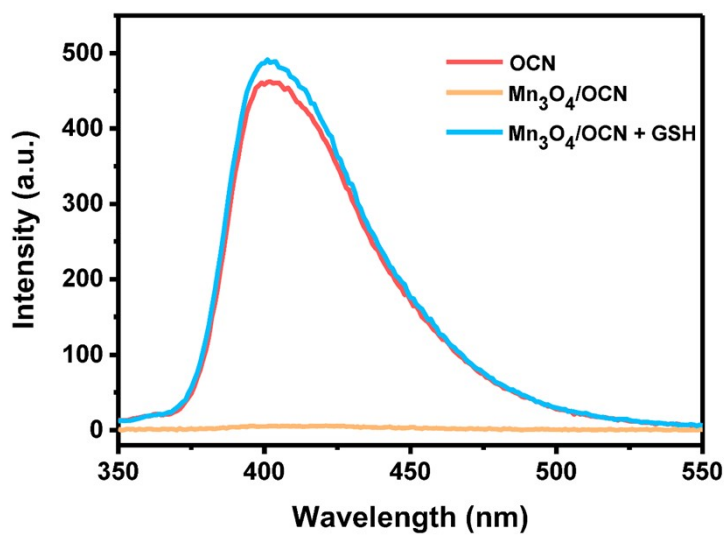

**Fig. S9** Fluorescence spectra of OCN, Mn<sub>3</sub>O<sub>4</sub>/OCN, and Mn<sub>3</sub>O<sub>4</sub>/OCN treated with GSH.

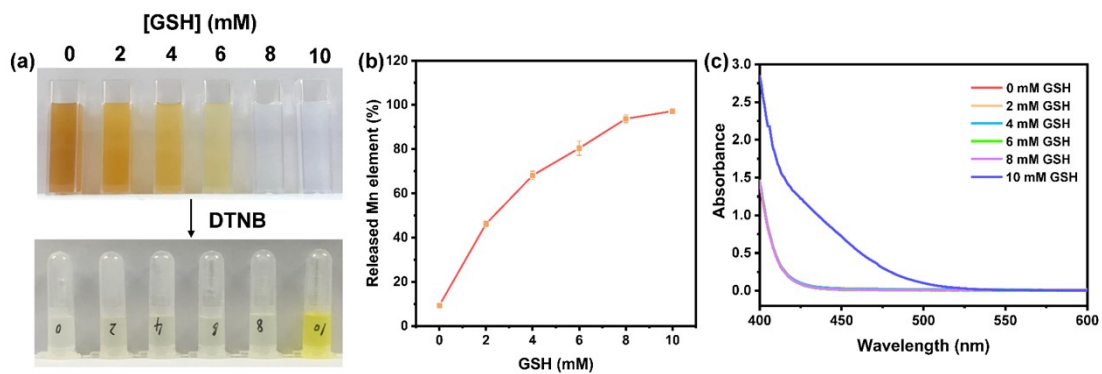

**Fig. S10** (a) Photographs showing the degradation behavior of  $\text{Mn}_3\text{O}_4/\text{OCN}$  (OCN: white color) with a concentration of  $400 \mu\text{g}/\text{mL}$  in different concentrations of GSH solutions (upper row) and the detection of remaining GSH in the supernatant (lower row). (b) The release percentage of Mn in the supernatant determined by ICP-AES. (c) The corresponding absorption spectra of the solutions showed in the lower row of (a).

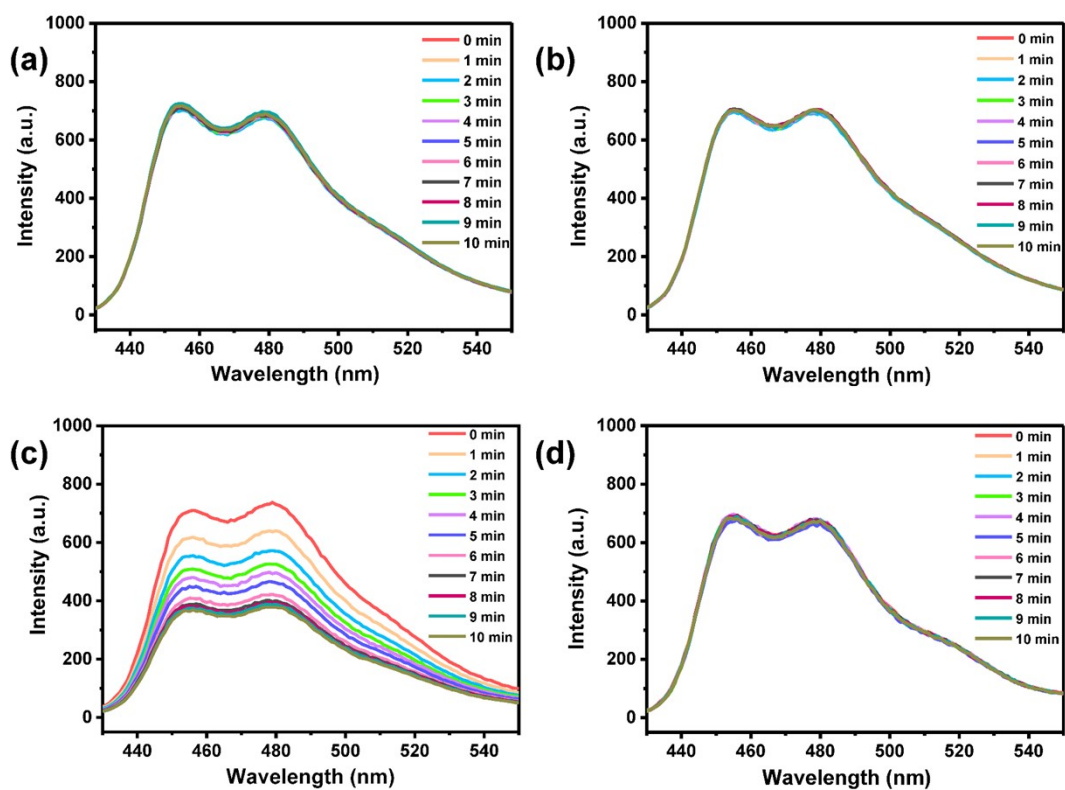

**Fig. S11** Fluorescence spectra of DPBF in different groups after US irradiation: (a) DPBF only (control group); (b) DPBF + Mn<sub>3</sub>O<sub>4</sub>/OCN@BSA; (c) DPBF + Mn<sub>3</sub>O<sub>4</sub>/OCN-PpIX@BSA; (d) DPBF + Mn<sub>3</sub>O<sub>4</sub>/OCN-PpIX@BSA + NaN<sub>3</sub> (Inhibition group).



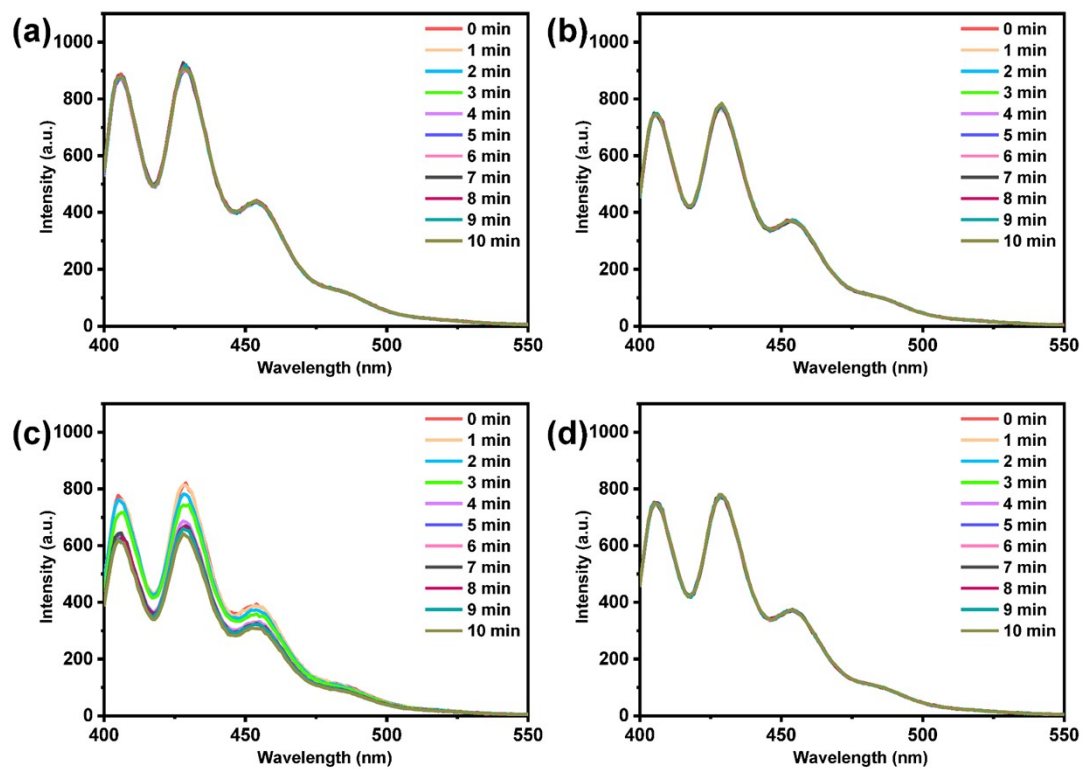

**Fig. S12** Fluorescence spectra of ABDA in different groups after US irradiation: (a) ABDA only (control group); (b) ABDA + Mn<sub>3</sub>O<sub>4</sub>/OCN@BSA; (c) ABDA + Mn<sub>3</sub>O<sub>4</sub>/OCN-PpIX@BSA; (d) ABDA + Mn<sub>3</sub>O<sub>4</sub>/OCN-PpIX@BSA + NaN<sub>3</sub> (Inhibition group).

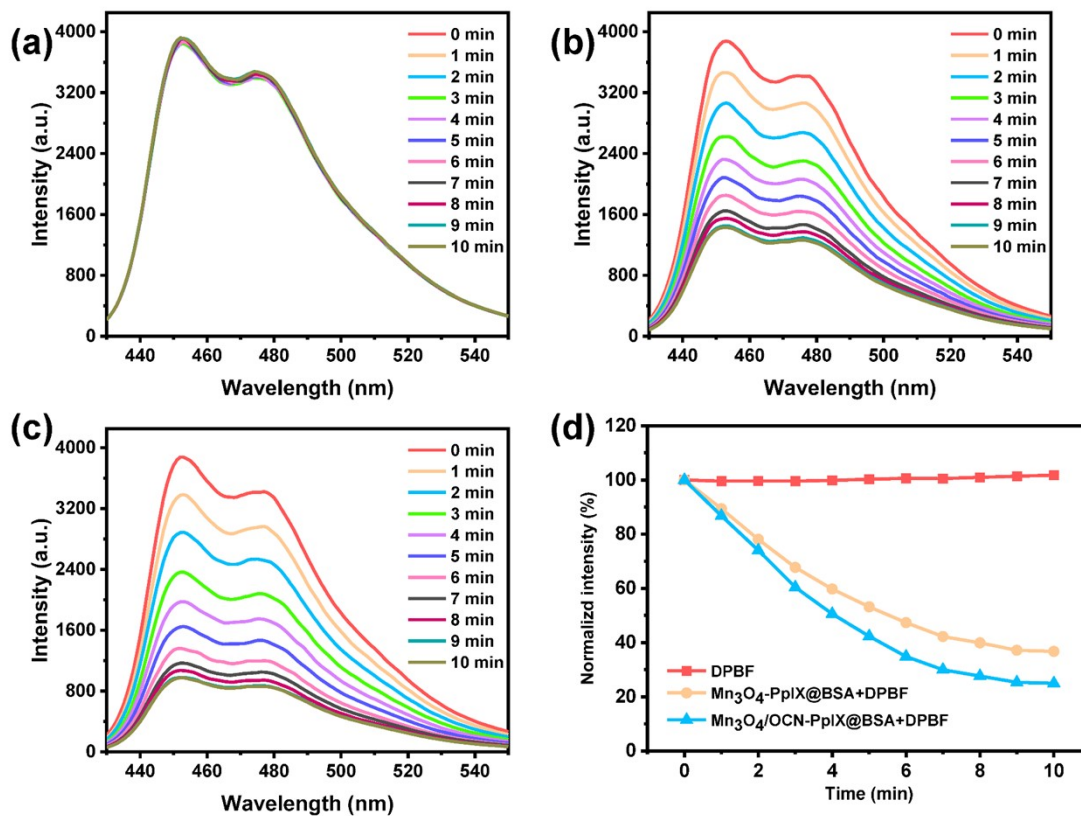

**Fig. S13** Fluorescence spectra of DPBF in different groups after US irradiation: (a) DPBF only (control group); (b) DPBF + Mn<sub>3</sub>O<sub>4</sub>-PpIX@BSA; (c) DPBF + Mn<sub>3</sub>O<sub>4</sub>/OCN-PpIX@BSA. (d) Changes in the fluorescence intensity of DPBF ( $\lambda_{em}=456$  nm) with US irradiation time (power density = 1 W/cm<sup>2</sup>, frequency = 1 MHz, duty cycle = 50%, and pulse frequency = 100 Hz) in different groups. Mn concentration: 50  $\mu$ M.

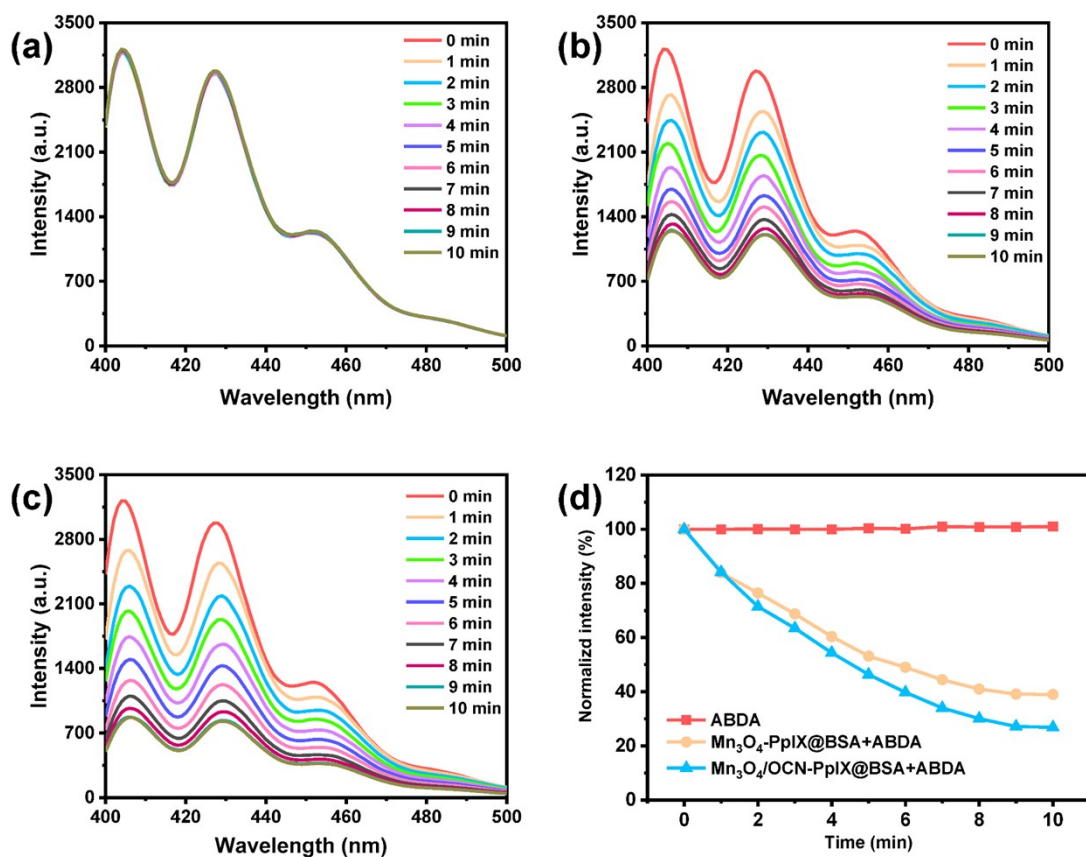

**Fig. S14** Fluorescence spectra of ABDA in different groups after US irradiation: (a) ABDA only (control group); (b) ABDA + Mn<sub>3</sub>O<sub>4</sub>-PpIX@BSA; (c) ABDA + Mn<sub>3</sub>O<sub>4</sub>/OCN-PpIX@BSA. (d) Changes in fluorescence intensity of ABDA ( $\lambda_{em}=427$  nm) with US irradiation time (power density = 1 W/cm<sup>2</sup>, frequency = 1 MHz, duty cycle = 50%, and pulse frequency = 100 Hz) in different groups. Mn concentration: 50  $\mu$ M.

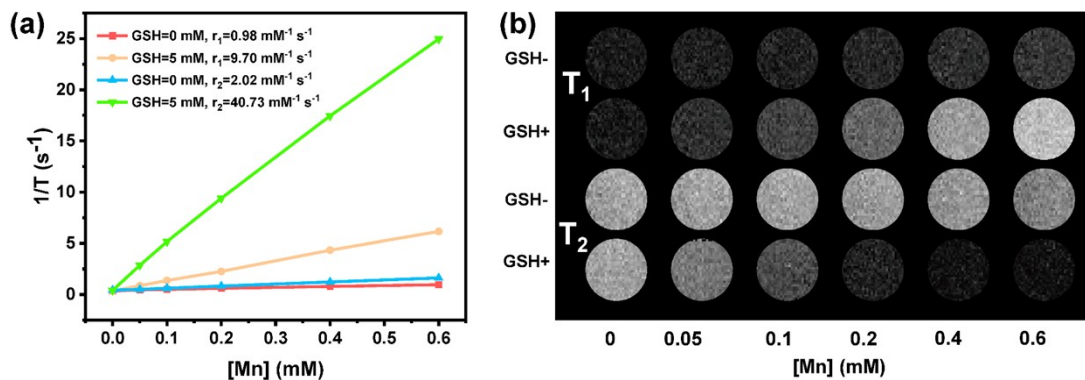

**Fig. S15** (a) Plots of  $1/T$  as a function of Mn concentration for Mn<sub>3</sub>O<sub>4</sub>-PpIX@BSA and Mn<sub>3</sub>O<sub>4</sub>-PpIX@BSA + GSH (5 mM). (b) Corresponding T<sub>1</sub>- and T<sub>2</sub>-weighted MRI images for Mn<sub>3</sub>O<sub>4</sub>-PpIX@BSA treated with GSH (5 mM) or not.

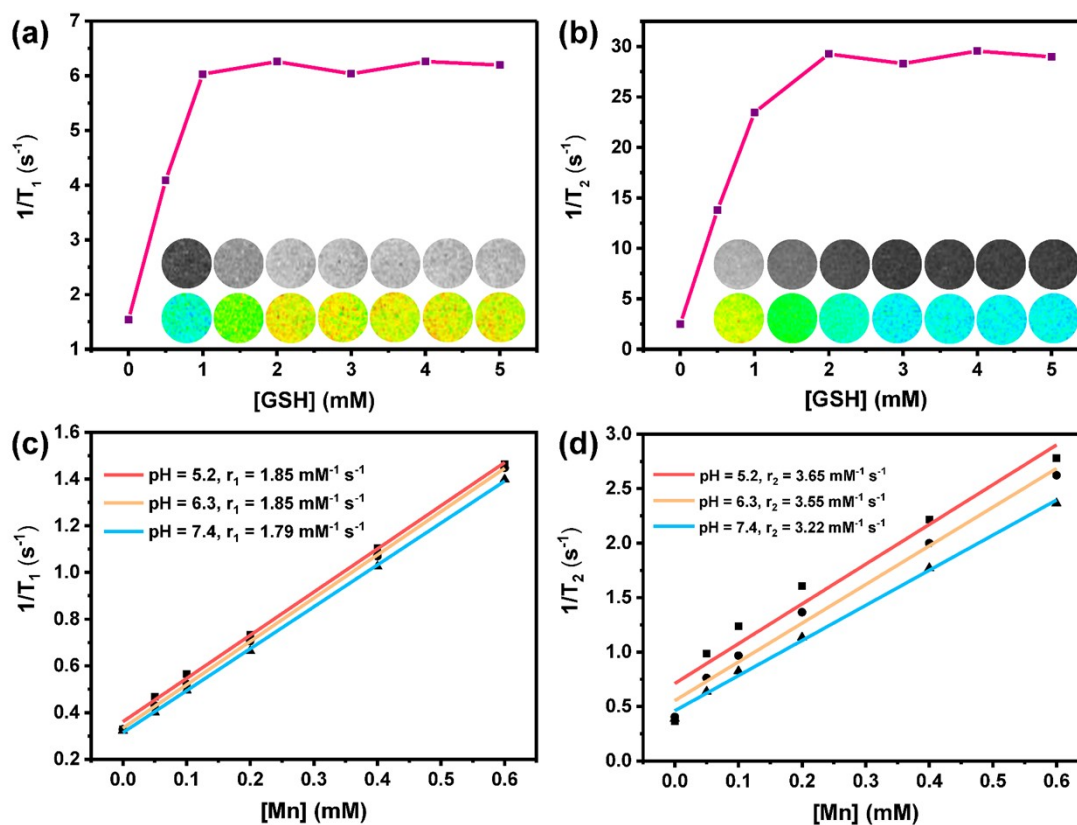

**Fig. S16** T<sub>1</sub> (a) and T<sub>2</sub> (b) relaxation rate ( $1/T_1$ ,  $1/T_2$ ) together with corresponding MRI images for Mn<sub>3</sub>O<sub>4</sub>/OCN-PpIX@BSA in different concentrations of GSH solution ([Mn] = 0.6 mM).  $1/T_1$  (c) and  $1/T_2$  (d) values of Mn<sub>3</sub>O<sub>4</sub>/OCN-PpIX@BSA in PBS solutions with different pH as a function of Mn<sup>2+</sup> concentration.

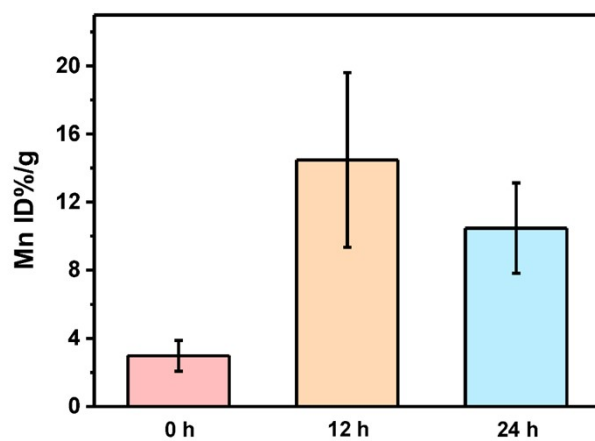

**Fig. S17** Mn element concentration in tumors measured by ICP-AES before (0 h) and after (12 and 24 h post-injection) intravenous injection of  $\text{Mn}_3\text{O}_4/\text{OCN-PpIX@BSA}$  (3 mice per group).
